# Supplementary material
Source: Research Square preprint supplement (doi:10.21203/rs.3.rs-10093252/v1)
Supplement: Supplementary file 2 [file cc7e9dea0a059b08fe85e607.docx]

# Supplementary Information

## Supplementary Methods: parameters and settings

Generative grid. The generator exposes three parameters: mean transcripts per cell (density), cell packing (cells per unit area), and displacement. The main grid comprises 125 points, a five-level sweep across each of the three axes. The exact axis values, together with reference compositions and all other parameters, are in the committed configuration in the repository; the pipeline regenerates every result from a single command. The dense-tissue regime used for the bound is about 13,600 cells/mm2.

Emission model. Transcript counts are emitted as Poisson by default, and as negative-binomial (dispersion near 4.19) when within-type expression variance is modeled.

Displacement model. Transcripts are displaced from their cell of origin by a Gaussian model by default; a non-Gaussian variant is used in the robustness battery.

Geometry. Space is partitioned by Voronoi tessellation by default; a non-Voronoi variant is used in the robustness battery.

Expression profiles. Per-type profiles are realistic and overlapping, derived from real references or from clustering the real fields.

Oracle. Given the known generative model, the oracle assigns each transcript to the cell of maximum posterior probability, combining the spatial likelihood under the displacement model with the gene likelihood under the per-type profiles. Oracle accuracy is the fraction of transcripts assigned to their true cell, evaluated on a converged spatial grid. At every grid point the oracle equals or exceeds the naive nearest-center baseline.

Displacement pinning. Displacement is pinned from a spatial marker-leakage statistic: for each marker, the excess of its signal in cells adjacent to a marker-positive cell over distant cells. A marker is admissible only if this signal exceeds a position-permutation null over 1,000 permutations at P < 0.05, a criterion defined without reference to the resulting displacement. Displacement is fit to the aggregate leakage of admissible markers, with a 2,000-resample bootstrap over markers and cells for the confidence interval. Breast pinned at 1.99 micrometres (95% CI 1.43 to 2.63), lung at 1.83 micrometres (CI 1.62 to 2.08).

## Supplementary Code and Software

Provided to meet the Nature Portfolio code-availability policy.

Repository. https://github.com/RuiYamasaki/st-recoverability, public, under the MIT License, with an installation guide, a demo on example data, and a one-command full-regeneration entry point.

Archived version. Zenodo concept DOI https://doi.org/10.5281/zenodo.20760704, which resolves to the latest archived version (v1.0.1 archived).

Language and dependencies. Python; dependencies pinned in the repository dependency file. External segmentation and reassignment tools used in the headroom comparison: Baysor 0.7.1, Proseg 3.1.1, ComSeg 1.8.5.

Operating system and install time. On a Microsoft Windows 11 Pro laptop (build 26200, ARM64, 12-core Snapdragon X, 31.6 GB RAM) running Python 3.13.7, a clean install of the pinned dependencies into a fresh virtual environment completed in about 1.2 minutes (73 seconds end to end, comprising 6 seconds to create the environment and 67 seconds to install the 33 pinned packages with pip from a warm wheel cache).

Demo. The example demo (src/demo.py) completed in about 4 seconds (under 0.1 minute) and produced the printed best-possible (oracle) versus naive transcript-to-cell assignment accuracy for a sparse and a dense synthetic tissue, together with a two-bar comparison plot (figures/demo_oracle_vs_naive.png).

Reproducibility. All randomness uses fixed, recorded seeds. A single command re-derives every committed result and figure byte-identically, and cross-gate regeneration was verified to produce zero differences.

## Supplementary Tables

For inclusion if too large for the corresponding Extended Data item:

- Full per-marker validity tables for both datasets (all candidate markers, adjacent-minus-distant signal, permutation P value, admissibility).
- Full cell-typing stability tables across all alternative cell-typing choices.

These are exported directly from the committed results.

## Supplementary Notes

Extended limitations and sensitivity discussion, expanded from the main-text Discussion if reviewers request: the model-relative nature of the bound and the calibration that supports its transfer to real data; the dense-tissue scope, outside which the ceiling rises; the selection-on-significance concern and the roughly fivefold margin, with the lung near-zero-selection control; and the finding that transcript displacement contributes to but does not by itself account for the spurious co-expression, so the artifact conclusion rests on unrecoverability and orthogonal contradiction rather than on the displacement mechanism.
